# Benign Transport of Breast Epithelium Into Axillary Lymph Nodes After Biopsy

Beverley A. Carter MD,<sup>1,2</sup> Roy A. Jensen, MD,<sup>1</sup> Jean F. Simpson, MD,<sup>1</sup> and David L. Page, MD<sup>1</sup>

**Key Words:** Breast cancer; Micrometastases; Lymph nodes; Histology

## Abstract

*The most important prognostic indicator of distant metastasis in breast cancer is histologic documentation of axillary lymph node metastasis. Controversy exists about the importance of micrometastases (<0.2 cm), and current pathology practice includes a careful search for their presence. We describe the histologic findings in a series of axillary lymph node dissections taken approximately 2 weeks after breast biopsy. Each case has limited presence of epithelial cells in the subcapsular sinus of a draining lymph node that we attribute to mechanical transport of tumor and/or normal breast epithelium secondary to the previous surgical or needle manipulation. These cells were accompanied by hemosiderin-laden macrophages and damaged RBCs. While the clinical implication of these findings is unknown, we believe that it will be of no clinical significance and have no untoward prognostic effect.*

Incisional and intratumoral biopsy of breast lesions after detection of a clinical or mammographic abnormality is accepted as a safe and reliable diagnostic procedure. Major complications, such as hemorrhage or infection, are rare,<sup>1,2</sup> and less serious complications, such as hematoma formation, are easily prevented. Seeding of needle tracts and disturbance of lesional cells are more worrisome potential complications of biopsies done in women with a diagnosis of breast cancer. This phenomenon commonly is described after biopsy of gastrointestinal<sup>3</sup> and gynecologic<sup>4</sup> malignant neoplasms, and the implications and prognosis are well understood.

Needle tract seeding has been described after stereotactic core needle biopsy of the breast using a 14-gauge biopsy needle.<sup>5</sup> Youngson et al<sup>6</sup> in 1994 described a series of 29 surgical breast specimens in which displaced epithelial fragments were found in stroma or lymphovascular channels in breast lesions removed from women who had undergone a previous needle biopsy procedure. The authors stated that the biologic implications of this finding were unknown. In 1 case, papillary clusters of carcinoma cells, identical to the breast lesion, were seen in the subcapsular sinus of draining axillary lymph nodes on subsequent reexcision. The authors regarded this as metastatic carcinoma with all of its treatment and prognostic implications.<sup>6</sup>

In 1995 Youngson et al<sup>7</sup> again found displaced fragments of carcinomatous elements in 12 of 43 consecutive patients with breast carcinoma who had a surgical procedure after an initial 14-gauge stereotactic core biopsy. Although the authors were certain that the specific histologic features seen in the stroma in their series did not represent true invasive mammary carcinoma, they seemed less certain of the biologic implications of displaced tumor cells in lymphatic spaces.<sup>7</sup>

Brown et al<sup>8</sup> in 1995 demonstrated, using molecular techniques, the presence of circulating malignant cells perioperatively in women with breast cancer undergoing surgical tumor manipulation. Postoperatively, the authors found no circulating tumor cells. No prognostic significance was implied.<sup>8</sup>

Recently in our consultation service, we have seen several post-breast biopsy dissection specimens of axillary lymph nodes with epithelial cells in the subcapsular sinus that we attribute to benign lymphatic transport of these cells as a consequence of the previous surgical manipulation. The clinical significance of these findings is unknown, but we believe that it is important to note that these mechanically micrometastatic lesions are not present in the lymph node because of native metastatic capacity and are unlikely to implicate a risk for widespread disease or true metastasis.

## Materials and Methods

The consultative files of the Vanderbilt University Medical Center Breast Consultation Service (Nashville, TN) were reviewed. All cases that had lymph node samples taken after an initial breast biopsy were selected and studied. Fifteen cases were found to have fragments of epithelium in the subcapsular sinus accompanied by hemosiderin-laden macrophages, foreign body-type multinucleated giant cells, physically altered RBCs, and/or lymphocytes. Available microscopic slides were reviewed. The necessary history of previous manipulation was elucidated from available reports and the referring pathologist, clinician, or both. We found no analogous cases by nodal histologic criteria that did not have a recent history of instrumentation of the lesional breast.

## Results

### Clinicopathologic Features

Patient age ranged from 39 to 78 years. Three patients underwent a needle core biopsy, and the remainder underwent an excisional biopsy. A diagnosis of ductal carcinoma in situ was given in 7 cases, and invasive carcinoma was the diagnosis for the other 8 cases. All of the women underwent a second procedure that included axillary lymph node sampling. These procedures took place within 22.6 days, on average, of the initial biopsy. There was 1 outlier at 4 months, but most operations took place within 2 weeks.

On final diagnosis of the definitive specimen, 7 cases were ductal carcinoma in situ, 4 cases showed invasive mammary carcinoma, 1 had pleomorphic lobular carcinoma, and 3 had no evidence of residual cancer. Four women had benign epithelium (3 with micropapilloma), 5 had epithelium

identical to the ductal carcinoma in situ seen in the breast lesion, and 6 cases had cells identical to the invasive carcinoma in the subcapsular sinus of the draining axillary lymph node **Table 1**.

In the breast excision specimen, evidence of previous surgical manipulation was present in the form of recent needle track formation or biopsy site within or immediately adjacent to the lesion of interest **Image 1**.

In each case, the subcapsular sinus of at least 1 lymph node, usually an identified sentinel node, contained clusters of cells derived from the breast **Image 2**. Small clusters of epithelial cells, always smaller than 1 mm and usually 100 to 200  $\mu\text{m}$ , were accompanied by hemosiderin-laden macrophages, foreign body-type multinucleated giant cells, physically altered RBCs, and lymphocytes **Image 3**. In 11 cases, the epithelial clusters were from the carcinoma. However, in 4 cases, the epithelium noted in the subcapsular sinus was not derived from the cancerous breast lesion. Three cases showed papillary fragments **Image 4**, and 1 showed benign breast glands **Image 5**. Our only case of invasive lobular carcinoma showed individual cancer cells, not clusters, scattered in the lymph node sinus **Image 6**. In 3 cases, displaced cellular fragments also were noted lodged in lymphovascular spaces next to the needle track in the main reexcision specimen **Image 7**.

## Discussion

The presence of these tiny groups of epithelial cells in the lymph node subcapsular sinus could be interpreted in a number of ways: (1) They may represent metastases with implications for distant disease. (2) They may represent regional metastases with less obvious implications for distant disease and disease-free survival. (3) They may represent epithelial inclusions of embryologic or embolic histogenesis. (4) They may represent, as we believe, a forced habitation due to tumor disruption and displacement into nearby lymphatic vessels.

Small clusters of breast cancer epithelium in axillary lymph nodes usually are interpreted as local micrometastatic disease. Although the issue still is under discussion, the presence of micrometastatic disease may well portend a poorer long-term and disease-free survival for patients with a diagnosis of invasive mammary carcinoma. The American Joint Committee on Cancer, however, states that the prognosis for patients with pN1a micrometastatic ( $<0.2$  cm) disease is similar to that for patients with pN0 disease.<sup>9</sup>

The results of studies in this area are conflicting and should be interpreted with caution. Rosen et al<sup>10</sup> studied sufficient numbers of patients with micrometastatic disease

**Table 1**  
**Clinicopathologic Features**

| Case. No | Age (y) | Biopsy Type | Biopsy Diagnosis           | Interval | Surgery Type                              | Breast Final Diagnosis       | Lymph Node Diagnosis       |
|----------|---------|-------------|----------------------------|----------|-------------------------------------------|------------------------------|----------------------------|
| 1        | 66      | Excisional  | Invasive mammary carcinoma | 15 d     | Lumpectomy, axillary dissection           | Invasive mammary carcinoma   | Invasive mammary carcinoma |
| 2        | 41      | Needle      | Invasive mammary carcinoma | 21 d     | Modified mastectomy, sentinel node biopsy | Invasive mammary carcinoma   | Invasive mammary carcinoma |
| 3        | 39      | Excisional  | Invasive mammary carcinoma | 14 d     | Modified mastectomy, axillary dissection  | Invasive mammary carcinoma   | Invasive mammary carcinoma |
| 4        | 50      | Excisional  | Invasive mammary carcinoma | 14 d     | Modified mastectomy, axillary dissection  | Atypical lobular hyperplasia | Invasive mammary carcinoma |
| 5        | 69      | Needle      | Invasive mammary carcinoma | 15 d     | Modified mastectomy, axillary dissection  | Invasive mammary carcinoma   | Invasive mammary carcinoma |
| 6        | 55      | Excisional  | Invasive mammary carcinoma | 14 d     | Modified mastectomy, axillary dissection  | DCIS                         | DCIS                       |
| 7        | 72      | Excisional  | Invasive mammary carcinoma | 10 d     | Modified mastectomy, axillary dissection  | DCIS                         | DCIS                       |
| 8        | 42      | Excisional  | DCIS                       | 14 d     | Modified mastectomy, axillary dissection  | DCIS                         | DCIS                       |
| 9        | 39      | Excisional  | DCIS, papilloma            | 14 d     | Modified mastectomy, sentinel node biopsy | DCIS                         | DCIS                       |
| 10       | 43      | Excisional  | DCIS                       | 16 d     | Lumpectomy, axillary dissection           | DCIS                         | DCIS                       |
| 11       | 63      | Needle      | DCIS                       | 14 d     | Lumpectomy, axillary dissection           | DCIS                         | Benign epithelium          |
| 12       | 42      | Excisional  | DCIS, micropapilloma       | 4 mo     | Axillary dissection                       | Micropapilloma               | Micropapilloma             |
| 13       | 51      | Excisional  | DCIS, micropapilloma       | 21 d     | Modified mastectomy, axillary dissection  | Micropapilloma               | Micropapilloma             |
| 14       | 78      | Excisional  | DCIS                       | 14 d     | Modified mastectomy, sentinel node biopsy | DCIS, micropapilloma         | Micropapilloma             |
| 15       | 56      | Excisional  | Invasive lobular carcinoma | 15 d     | Modified mastectomy, axillary dissection  | Invasive lobular carcinoma   | Invasive lobular carcinoma |

DCIS, ductal carcinoma in situ.

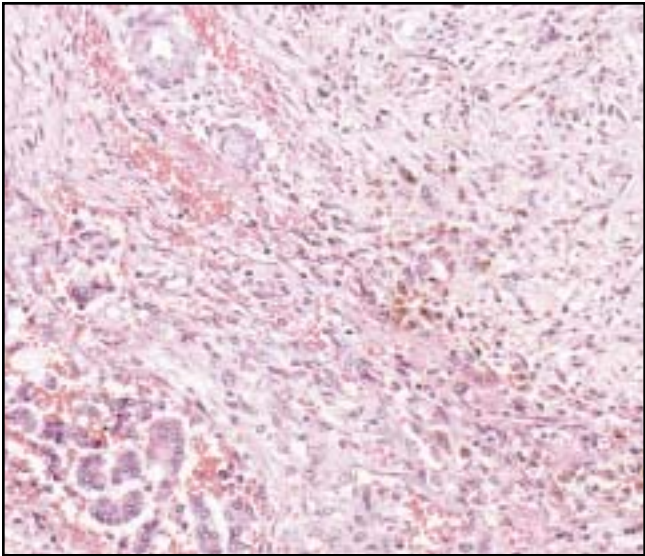

**Image 1** Needle biopsy site. Well-formed granulation tissue adjacent to dislodged epithelium surrounded by an inflammatory and reparative response (H&E, x40).

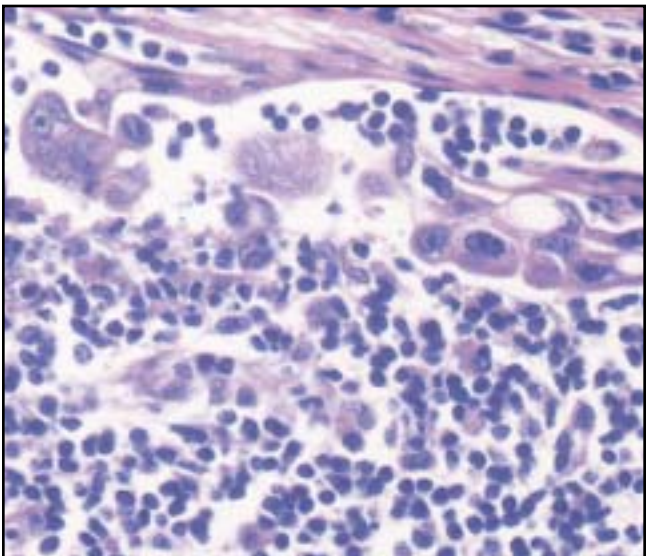

**Image 2** Several small clusters of tumor cells are present in the subcapsular sinus of the draining axillary lymph node (H&E, x200).

with follow-up of 10 years or more and found significant differences in outcome compared with patients with node-negative disease. Other authors had similar results using

special techniques, such as immunohistochemistry or multiple sections, with even shorter follow-up.<sup>11</sup> The publication of the study by the International (Ludwig) Breast



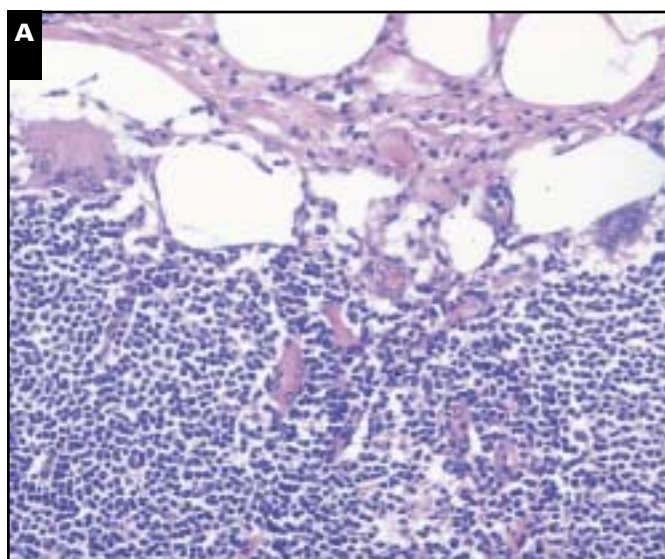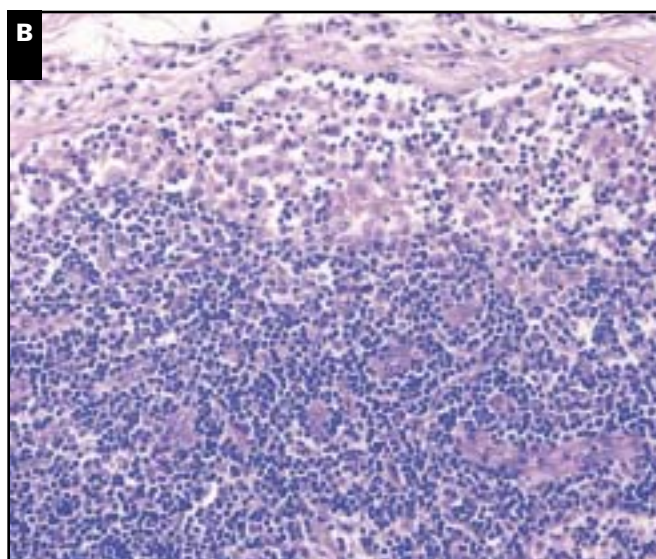

**Image 3** A, Foreign body-type multinucleated giant cell and foamy macrophages in the subcapsular sinus of the axillary lymph node (H&E,  $\times 100$ ). B, Hemosiderin-laden macrophages, lymphocytes, and debris in the subcapsular sinus (H&E,  $\times 100$ ).

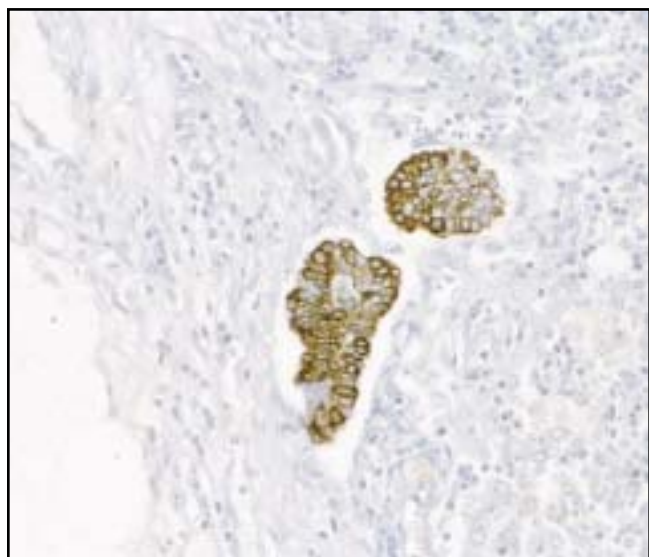

**Image 4** Papillary fragment in the lymph node of a patient with micropapillomas and ductal carcinoma in situ (cytokeratin,  $\times 200$ ).

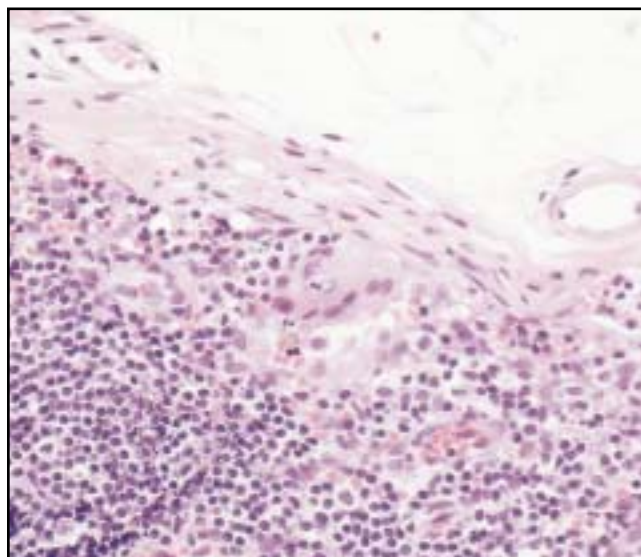

**Image 5** Distorted benign gland in the subcapsular sinus with associated inflammatory response (H&E,  $\times 200$ ).

Cancer Study Group<sup>11</sup> brought a flurry of letters questioning the methods, conclusions, and recommendations.<sup>12,13</sup>

More recently, no significant difference in survival was found when patients with micrometastatic deposits were compared with patients with node-negative breast cancer.<sup>14</sup> In a study of invasive lobular carcinoma, Trojani et al<sup>15</sup> showed that micrometastases detected by immunohistochemical studies had no prognostic significance. It therefore is imperative that the presence of breast epithelium of any size in axillary lymph nodes be described and diagnosed with care.

Altered RBCs and hemosiderin-laden macrophages are

essential for the diagnosis of benign transport of breast epithelium, and the diagnosis should be made with caution without their presence. We regard the proximity of these cells to the debris of the recent biopsy event as a guarantee that they occurred together in time and space. This microscopic finding is the usual, expected, reparative response to hemorrhage and trauma in the regional draining lymph nodes.

As noted in our results, this phenomenon is not restricted to breast cancer epithelium. Four of our cases revealed benign epithelium in the subcapsular sinus of the draining lymph node, and in all cases, this epithelium was

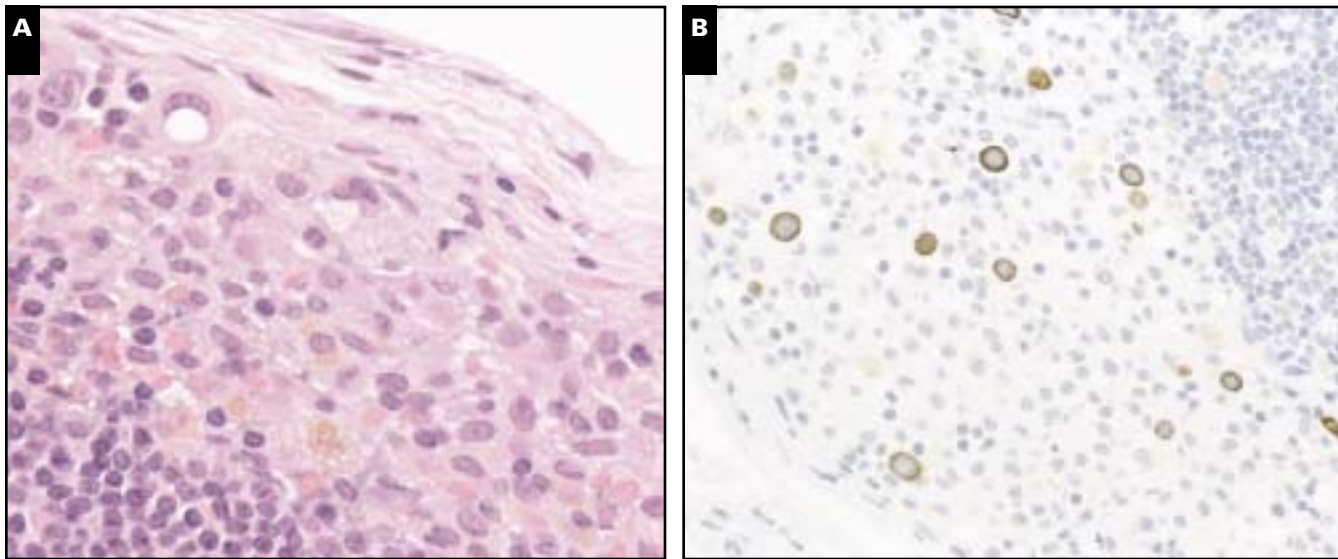

**Image 6** Single cells scattered in the subcapsular sinus of the axillary lymph node (A, H&E,  $\times 40$ ; B, cytokeratin,  $\times 40$ ).

found with postbiopsy cellular debris. In these cases, we think that adjacent papillomas or normal breast tissue was displaced surgically when the initial lesion was manipulated. Identical nodal findings after surgical manipulation of benign and malignant breast lesions support our benign transport hypothesis.

Cases identified by our group as benign transport differ from those seen in nodal heterotopic epithelial inclusions. These benign epithelial lesions may present any of the patterns found elsewhere in the breast.<sup>16</sup> In these cases, often seen in women with a diagnosis of tubular carcinoma,<sup>17</sup> glandular structures are banal and are without the attendant signs of previous tissue disruption. Interestingly, Fisher et al considered a history of previous biopsy as significant when determining causation.<sup>17</sup>

We analogize these findings to those of McDivitt et al<sup>18</sup> of embolic involvement of an axillary node by benign breast lesions, and we suggest that the mechanism of embolism is mechanical force into lymphatic channels. In our consultation service, transport of benign elements into peritumoral lymphovascular spaces, similar to the findings of Youngson et al,<sup>6,7</sup> after breast biopsy has been observed not infrequently. The recent work by Diaz et al<sup>19</sup> confirmed the relatively high rate of tumor displacement after large-gauge needle core biopsy. Other authors have suggested that mechanical force may disrupt and embolize susceptible tissues. Partial detachment of the placenta during continued contraction is readily accepted as the mechanical force behind trophoblastic and/or amniotic fluid emboli in the systemic vasculature and lung.<sup>20</sup> Perrone<sup>21</sup> believed the colonic glands she noted in lymph nodes obtained at colon resection 2 weeks after a colonoscopic biopsy of an adeno-

carcinoma were a result of mechanical trauma. Weeks et al<sup>22</sup> described benign nodal inclusions in pediatric patients with renal neoplasms, apparently as a result of rupture of obstructed renal tubules and clearance by local lymphatics. Clement et al<sup>23</sup> in 1996 described 2 cases of hyperplastic mesothelial cells in abdominal lymph nodes and agreed that these probably were present owing to the disruptive effect of ascites on hyperplastic mesothelium as proposed by Brooks et al<sup>24</sup> in their study of mediastinal lymph nodes in patients with pleural effusions. In both studies, the displaced mesothelium was located in the subcapsular sinus.<sup>23,24</sup> Vilela et al<sup>25</sup> described embolization of mesothelial cells in lymphatic spaces secondary to a pressure gradient in a patient with severe ascites. This forced transport of cells also elicited an inflammatory response, and it is this finding that differentiates this particular case from benign nodal mesothelial inclusions.<sup>25</sup>

The clinical implications of benign transport of tumor elements to axillary nodes in patients with a diagnosis of breast cancer are unclear. We believe that these findings most likely are of no clinical significance and a microscopic reflection of what must be a frequent event at the time of mechanical manipulation. The transport of benign glands to the sinus as seen in one of our cases lends much credence to that claim. Whether the tumoral enforced inhabitants of the lymph node have any true metastatic capability is unknown. Injected, highly selected, single tumor cells derived from cell lines with demonstrated metastatic capacity can have widespread metastatic capability experimentally, albeit to restricted organ systems.<sup>26</sup> Equally as important, in experimental work, it has been shown that the transient presence of single tumor cells in the peripheral blood is without untoward effect.



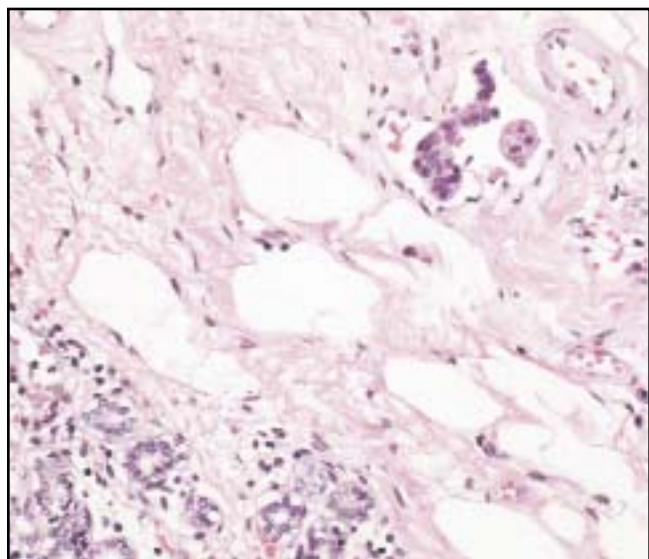

**Image 7** Excision specimen with disrupted tumor fragments in lymphatic spaces near the biopsy site (H&E, ×100).

Verification of the clinical import of this novel finding can be solved only with long-term studies with observation and follow-up. At present, we suggest that widespread metastases are not a risk but still recommend careful follow-up of patients for whom this diagnosis is made.

## Conclusions

Benign transport of breast epithelium into axillary lymph nodes after needle or surgical manipulation is a diagnosis that should be made with care. Cell clusters identical to the main breast lesion, altered RBCs, and an inflammatory response usually consisting of hemosiderin-laden macrophages are necessary for the diagnosis. Although not yet proven to be a benign event, prior information on equal survival for patients with incised and excised tumors strongly supports the likelihood that these findings will have no untoward prognostic implications. We believe that this phenomenon, in itself, does not carry risk of future metastatic behavior and look forward to larger and more extensive studies in this area.

From the <sup>1</sup>Department of Pathology, Vanderbilt University Medical Center, Nashville, TN and the <sup>2</sup>Department of Pathology and Molecular Medicine, McMaster University, Hamilton, Ontario Canada.

Address reprint requests to Dr Page: C-3321 Medical Center North, Vanderbilt University Medical Center, Nashville, TN 37232.  
Acknowledgments: We thank L.W. Dalton, MD, M.A. Brito, MD, J.C. Niewenhuis, MD, J. Hennessy, MD, K. Shimpi, MD, and

M.M. Boyd, MD, for submitting their cases for consultation and J.E. Olivella, MD, and E.P. Wright, MD, for submission of cases and clinical discussions.

## References

1. Nguyen M, McCombs M, Ghandehari S, et al. An update on core needle biopsy for radiologically detected breast lesions. *Cancer*. 1996;78:2340-2345.
2. Dershaw D, Liberman L. Stereotaxic breast biopsy: indications and results. *Oncology (Huntingt)*. 1998;12:907-916.
3. Martinez J, Targarona E, Balague C, et al. Port site metastasis: an unresolved problem in laparoscopic surgery: a review. *Int Surg*. 1995;80:315-321.
4. Sugarbaker T, Chang D, Koslowe P, et al. Pathobiology of peritoneal carcinomatosis from ovarian malignancy. *Cancer Treat Res*. 1996;81:63-74.
5. Harter L, Curtis J, Ponto G, et al. Malignant seeding of the needle track during stereotaxic core needle breast biopsy. *Radiology*. 1992;185:713-714.
6. Youngson B, Cranor M, Rosen P. Epithelial displacement in surgical breast specimens following needling procedures. *Am J Surg Pathol*. 1994;18:896-903.
7. Youngson B, Liberman L, Rosen P. Displacement of carcinomatous epithelium in surgical breast specimens following stereotaxic core biopsy. *Am J Clin Pathol*. 1995;103:598-602.
8. Brown D, Purushotham A, Birnie G, et al. Detection of intraoperative tumor cell dissemination in patients with breast cancer by use of reverse transcription and polymerase chain reaction. *Surgery*. 1995;117:96-101.
9. Fleming ID, Cooper JS, Hensen DE, et al (American Joint Committee on Cancer), eds. *Cancer Staging Manual*. 5th ed. Philadelphia, PA: Lippincott-Raven; 1997:171-180.
10. Rosen P, Saigo P, Braun D, et al. Axillary micro- and macrometastases in breast cancer. *Ann Surg*. 1981;194:585-591.
11. International (Ludwig) Breast Cancer Study Group. Prognostic importance of occult axillary lymph node micrometastases from breast cancers. *Lancet*. 1990;335:1565-1568.
12. Anderson T. Occult axillary lymph-node micrometastases in breast cancer [letter]. *Lancet*. 1990;336:435.
13. Galea M, Ellis I, Elston C et al. Occult axillary lymph-node metastases in breast cancer [letter]. *Lancet*. 1990;336:435.
14. Nassar I, Lee A, Bosari S, et al. Occult axillary lymph node metastases in "node-negative" breast carcinoma. *Hum Pathol*. 1993;24:950-957.
15. Trojani M, deMascarel I, Coindre JM, et al. Micrometastases to axillary lymph nodes from invasive lobular carcinoma of the breast: detection by immunohistochemistry and prognostic significance. *Br J Cancer*. 1987;56:838-839.
16. Page D, Anderson T. Metastasis of breast cancer. In: Page D, Anderson T, eds. *Diagnostic Histopathology of the Breast*. Edinburgh, Scotland: Churchill Livingstone; 1988:321-322.
17. Fisher C, Hill S, Millis R. Benign lymph node inclusions mimicking metastatic carcinoma. *J Clin Pathol*. 1994;47:245-247.
18. McDivitt RW, Stewart FW, Berg JW. Tumors of the breast. *Atlas of Tumor Pathology*. Second series, Fascicle 2. Washington, DC: Armed Forces Institute of Pathology; 1967:112-116.

19. Diaz LK, Porter GA, Venta LA et al. Tumor displacement in large gauge needle core biopsies: presence in excision specimens [abstract]. *Mod Pathol*. 1999;12:19a.
20. Kuhn C, West WW, Craighead JE, et al. Lungs. In: Damjanov I, Linder J, eds. *Anderson's Pathology*. 10th ed. St Louis, MO: Mosby-Year Book; 1996:1499.
21. Perrone T. Embolization of benign colonic glands to mesenteric lymph nodes [letter]. *Am J Surg Pathol*. 1985;9:538-541.
22. Weeks D, Beckwith J, Mierau G. Benign nodal lesions mimicking metastases from pediatric renal neoplasms: a report of the National Wilms Tumor Study Pathology Center. *Hum Pathol*. 1990;21:1239-1244.
23. Clement P, Young R, Oliva E. Hyperplastic mesothelial cells within abdominal lymph nodes: mimic of metastatic ovarian carcinoma and serous borderline tumor? a report of two cases associated with ovarian neoplasms. *Mod Pathol*. 1996;9:879-886.
24. Brooks J, LiVolsi V, Pietra G. Mesothelial cell inclusions in mediastinal lymph nodes mimicking metastatic carcinoma. *Am J Clin Pathol*. 1990;93:741-748.
25. Vilela D, Garcia F. Embolization of mesothelial cells in lymphatics: the route to mesothelial inclusions in lymph nodes? *Histopathology*. 1998;33:570-575.
26. Fidler I, Talmadge J. Evidence that intravenously derived murine pulmonary melanoma metastases can originate from the expansion of a single tumor cell. *Cancer Res*. 1986;46:5167-5171.

# First and Only FDA Cleared Digital Cytology System

**Genius™ Cervical AI**

**Genius™ Review Station**

**Genius™ Digital Imager**

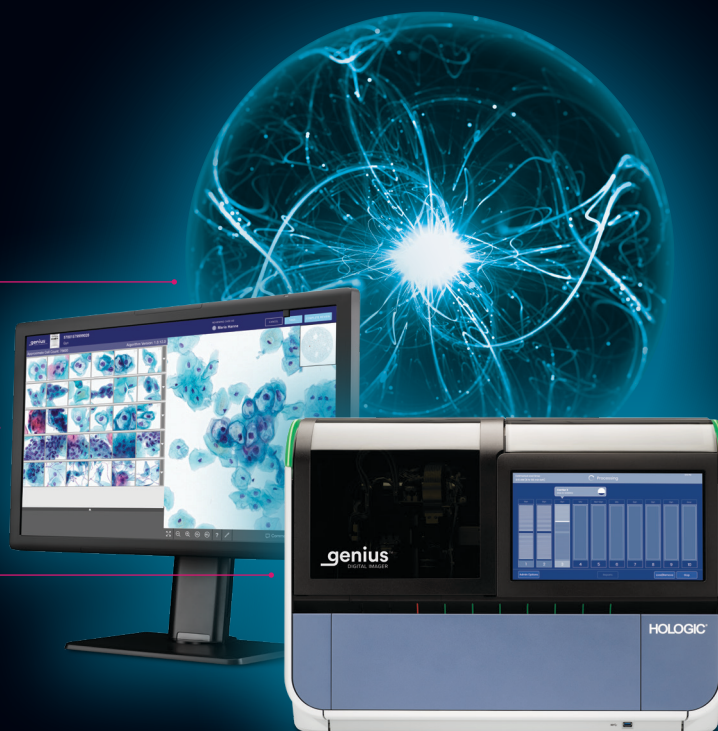

## Empower Your Genius With Ours

**Make a Greater Impact on Cervical Cancer**  
with the Advanced Technology of the  
Genius™ Digital Diagnostics System

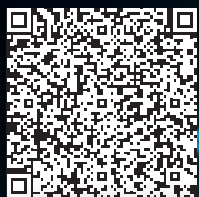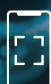

**Click or Scan**  
to discover more

ADS-04159-001 Rev 001 © 2024 Hologic, Inc. All rights reserved. Hologic, Genius, and associated logos are trademarks and/or registered trademarks of Hologic, Inc. and/or its subsidiaries in the United States and/or other countries. This information is intended for medical professionals in the U.S. and other markets and is not intended as a product solicitation or promotion where such activities are prohibited. Because Hologic materials are distributed through websites, podcasts and tradeshows, it is not always possible to control where such materials appear. For specific information on what products are available for sale in a particular country, please contact your Hologic representative or write to [diagnostic.solutions@hologic.com](mailto:diagnostic.solutions@hologic.com).

**genius™**  
DIGITAL DIAGNOSTICS
